# Supplementary material for: Plasma Fatty Acids and Quantitative Ultrasound, DXA and pQCT Derived Parameters in Postmenopausal Spanish Women
Source: MDPI journal article supplement (doi:10.3390/nu13051454), 2021-04-25
Supplement: s1 [file s1]

**Supplementary Table S1.** Bivariate and partial correlations between plasma fatty acids profile and bone mineral density at either the lumbar spine or the hips.

|                           |                        | BMD L2-<br>L4<br>(g/cm2) | BMD<br>L2<br>(g/cm2) | BMD<br>L3<br>(g/cm2) | BMD<br>L4<br>(g/cm2) | BMD<br>trochanter<br>(g/cm2) | BMD<br>Femoral<br>neck (g/cm2) |
|---------------------------|------------------------|--------------------------|----------------------|----------------------|----------------------|------------------------------|--------------------------------|
| C8:0 Caprylic acid        | Spearman Rho           | -0.061                   | -0.057               | -0.075               | -0.051               | -0.054                       | 0.005                          |
|                           | <i>p</i> -Value        | 0.294                    | 0.32                 | 0.193                | 0.38                 | 0.351                        | 0.929                          |
| C10:0 Decanoic acid       | Spearman Rho           | -0.119                   | -0.115               | -0.105               | -0.113               | -0.103                       | -0.154                         |
|                           | <i>p</i> -Value        | 0.039                    | 0.046                | 0.068                | 0.05                 | 0.074                        | 0.007                          |
|                           | Adjusted coefficient * | -0.094                   | -0.097               |                      | -0.084               |                              | -0.115                         |
|                           | <i>p</i> -Value        | 0.123                    | 0.111                |                      | 0.171                |                              | 0.060                          |
| C12:0 Lauric acid         | Spearman Rho           | -0.094                   | -0.077               | -0.093               | -0.1                 | -0.078                       | -0.125                         |
|                           | <i>p</i> -Value        | 0.102                    | 0.185                | 0.108                | 0.084                | 0.179                        | 0.031                          |
|                           | Adjusted coefficient * |                          |                      |                      |                      |                              | -0.144                         |
|                           | <i>p</i> -Value        |                          |                      |                      |                      |                              | 0.018                          |
| C14:0 Myristic acid       | Spearman Rho           | 0.018                    | -0.008               | 0.02                 | 0.035                | 0.008                        | 0.052                          |
|                           | <i>p</i> -Value        | 0.753                    | 0.89                 | 0.732                | 0.545                | 0.891                        | 0.366                          |
| C16:0 Palmitic acid       | Spearman Rho           | 0.051                    | 0.034                | 0.044                | 0.062                | 0.049                        | 0.075                          |
|                           | <i>p</i> -Value        | 0.382                    | 0.555                | 0.448                | 0.286                | 0.399                        | 0.194                          |
| C18:0 Stearic acid        | Spearman Rho           | 0.039                    | 0.026                | 0.036                | 0.037                | 0.033                        | 0.047                          |
|                           | <i>p</i> -Value        | 0.503                    | 0.657                | 0.531                | 0.528                | 0.564                        | 0.413                          |
| C20:0 Arachidic acid      | Spearman Rho           | -0.039                   | -0.037               | -0.042               | -0.043               | -0.021                       | 0.042                          |
|                           | <i>p</i> -Value        | 0.501                    | 0.527                | 0.469                | 0.461                | 0.718                        | 0.469                          |
| C22:0 Docosanoic acid     | Spearman Rho           | 0.05                     | 0.057                | 0.055                | 0.028                | -0.002                       | -0.001                         |
|                           | <i>p</i> -Value        | 0.387                    | 0.326                | 0.343                | 0.626                | 0.978                        | 0.98                           |
| C24:0 Lignoceric acid     | Spearman Rho           | 0.004                    | 0.025                | -0.008               | -0.001               | -0.048                       | -0.075                         |
|                           | <i>p</i> -Value        | 0.945                    | 0.663                | 0.884                | 0.984                | 0.403                        | 0.194                          |
| C16:1 Palmitoleic acid    | Spearman Rho           | -0.061                   | -0.064               | -0.052               | -0.049               | -0.044                       | -0.029                         |
|                           | <i>p</i> -Value        | 0.292                    | 0.269                | 0.365                | 0.399                | 0.449                        | 0.619                          |
| C18:1 cis (n9) Oleic acid | Spearman Rho           | -0.104                   | -0.111               | -0.097               | -0.08                | -0.099                       | -0.092                         |
|                           | <i>p</i> -Value        | 0.071                    | 0.055                | 0.093                | 0.165                | 0.087                        | 0.113                          |
| C22:1 (n9) Erucic acid    | Spearman Rho           | -0.021                   | -0.025               | -0.023               | -0.017               | -0.043                       | -0.122                         |
|                           | <i>p</i> -Value        | 0.711                    | 0.661                | 0.685                | 0.766                | 0.46                         | 0.035                          |
|                           | Adjusted coefficient * |                          |                      |                      |                      |                              | -0.114                         |
|                           |                        |                          |                      |                      |                      |                              |                                |

|                            |                    | <i>p</i> -Value             |        |        |        |        | 0.063  |
|----------------------------|--------------------|-----------------------------|--------|--------|--------|--------|--------|
| C18:3                      | (n3)               |                             |        |        |        |        |        |
| Linolenic acid (ALA)       | acid               | Spearman Rho                | 0.119  | 0.109  | 0.106  | 0.119  | 0.026  |
|                            |                    | <i>p</i> -Value             | 0.039  | 0.058  | 0.066  | 0.039  | 0.654  |
|                            |                    | <i>Adjusted coefficient</i> |        |        |        |        |        |
|                            |                    | *                           | 0.111  |        |        | 0.123  |        |
|                            |                    | <i>p</i> -Value             | 0.069  |        |        | 0.044  |        |
| C20:5                      | (n3)               |                             |        |        |        |        |        |
| Eicosapentenoic acid (EPA) | acid               | Spearman Rho                | -0.036 | -0.046 | -0.042 | -0.015 | -0.009 |
|                            |                    | <i>p</i> -Value             | 0.534  | 0.428  | 0.468  | 0.79   | 0.875  |
| C22:6                      | (n3)               |                             |        |        |        |        |        |
| Docosahexenoic acid (DHA)  | acid               | Spearman Rho                | 0.133  | 0.128  | 0.114  | 0.147  | 0.083  |
|                            |                    | <i>p</i> -Value             | 0.021  | 0.026  | 0.049  | 0.011  | 0.151  |
|                            |                    | <i>Adjusted coefficient</i> |        |        |        |        |        |
|                            |                    | *                           | 0.135  | 0.148  | 0.122  | 0.136  |        |
|                            |                    | <i>p</i> -Value             | 0.026  | 0.015  | 0.045  | 0.026  |        |
| C18:2 (n6)                 | Linoleic acid (LA) | Spearman Rho                | -0.014 | 0.017  | -0.018 | -0.029 | 0.014  |
|                            |                    | <i>p</i> -Value             | 0.805  | 0.773  | 0.76   | 0.613  | 0.809  |
| C20:4                      | (n6)               |                             |        |        |        |        |        |
| Arachidonic acid (AA)      | acid               | Spearman Rho                | 0.054  | 0.064  | 0.088  | 0.015  | 0.031  |
|                            |                    | <i>p</i> -Value             | 0.355  | 0.271  | 0.13   | 0.802  | 0.595  |

\* Partial non parametric correlations adjusted by, age, years since menopause, BMI and vitamin D, calcium and energy intakes.

**Supplementary Table S2.** Logistic regression of fatty acids associated with low BMD ( $T \leq -1$  score).

|                                       | Univariate |                |         | Multivariate |             |         |
|---------------------------------------|------------|----------------|---------|--------------|-------------|---------|
|                                       | OR         | 95% CI         | p-Value | OR           | 95% CI      | p-Value |
| C8:0 Caprylic acid                    | 2.750      | 0.023-322.722  | 0.667   |              |             |         |
| C10:0 Decanoic acid                   | 2.958      | 1.131-7.736    | 0.027   | 2.412        | 0.881-6.598 | 0.087   |
| C12:0 Lauric acid                     | 1.542      | 0.826-2.878    | 0.174   |              |             |         |
| C14:0 Myristic acid                   | 0.851      | 0.296-2.448    | 0.764   |              |             |         |
| C16:0 Palmitic acid                   | 0.925      | 0.844-1.013    | 0.093   |              |             |         |
| C18:0 Stearic acid                    | 0.978      | 0.922-1.038    | 0.465   |              |             |         |
| C20:0 Arachidic acid                  | 1.166      | 0.894-1.522    | 0.257   |              |             |         |
| C22:0 Docosanoic acid                 | 0.581      | 0.104-3.243    | 0.536   |              |             |         |
| C24:0 Lignoceric acid                 | 1.400      | 0.226-8.677    | 0.718   |              |             |         |
| C16:1 Palmitoleic acid                | 1.100      | 0.559-2.165    | 0.782   |              |             |         |
| C18:1 cis (n9) Oleic acid             | 1.083      | 0.996-1.177    | 0.061   |              |             |         |
| C22:1 (n9) Erucic acid                | 0.054      | 0.000-1823.809 | 0.584   |              |             |         |
| C18:3 (n3) Linolenic acid (ALA)       | 0.742      | 0.524-1.050    | 0.092   |              |             |         |
| C20:5 (n3) Eicosapentenoic acid (EPA) | 1.612      | 0.623-4.169    | 0.325   |              |             |         |
| C22:6 (n3) Docosahexenoic acid (DHA)  | 0.757      | 0.561-1.023    | 0.070   |              |             |         |
| C18:2 (n6) Linoleic acid (LA)         | 1.044      | 0.970-1.125    | 0.250   |              |             |         |
| C20:4 (n6) Arachidonic acid (AA)      | 0.902      | 0.744-1.050    | 0.184   |              |             |         |

OR: Odds ratio; CI: Confidence interval

Multivariate model adjusted by: Age (years), Years since menopause (years) BMI (kg/m<sup>2</sup>), Vitamin D (mcrg/day), Calcium intake (mg/day), Energy (kcal/day)
